# Supplementary material for: Web Hacking: Attacks and Defense
Source: Royal Society of Chemistry journal article supplement (doi:10.1039/c2an35406c), 2002-08-08
Supplement: c2an35406c.pdf [file c2an35406c.pdf]

## Generating contrast in hyperpolarized $^{13}\text{C}$ MRI using ligand–receptor interactions

Kayvan R. Keshari<sup>a</sup>, John Kurhanewicz<sup>a</sup>, Jeffrey M. Macdonald<sup>b</sup>, and David M. Wilson<sup>a</sup>

<sup>a</sup> Department of Radiology, University of California San Francisco, San Francisco, USA. E-mail: david.m.wilson@ucsf.edu; Tel: (415)353-1668

<sup>b</sup> Department of Biomedical Imaging, University of North Carolina Chapel Hill (UNC-CH), Chapel Hill, North Carolina, USA

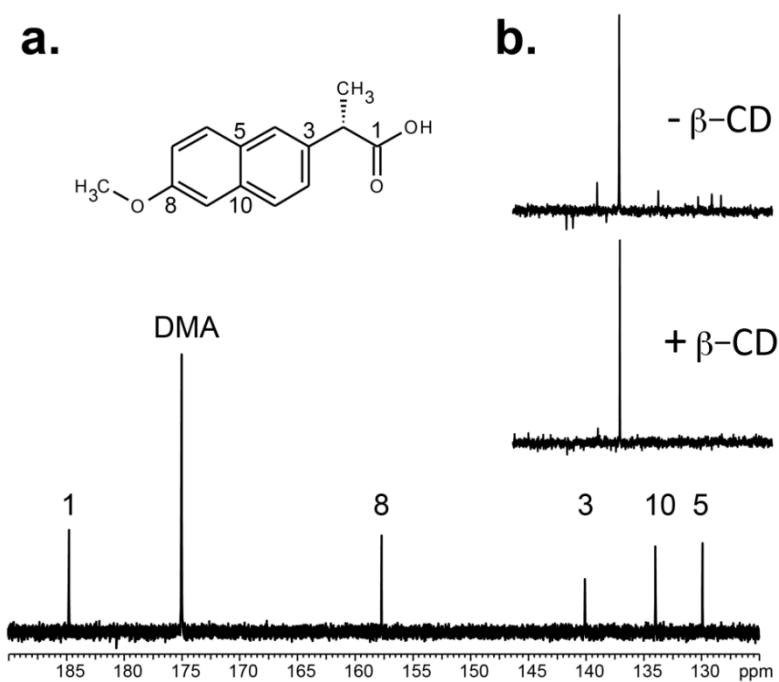

**Supplementary Figure 1.** (a) Hyperpolarized  $^{13}\text{C}$  spectrum of natural abundance naproxen, obtained in a single  $5^\circ$  pulse. The labeled (long  $T_1$ ) carbon resonances are seen as is the carbonyl carbon of dimethylacetamide (DMA). (b) Effect of adding the  $\beta$ -cyclodextrin receptor on hyperpolarized signals. Only the C1 carbon resonance is visualized.
